# Supplementary material
Source: ML conference proceedings conference paper supplement (https://www.ecva.net/papers/eccv_2022/papers_ECCV/html/136840628_ECCV_2022_paper.php)
Supplement: Supplementary file 1 [file 136840628-supp.pdf]

# Breadcrumbs: Adversarial Class-Balanced Sampling for Long-tailed Recognition

Bo Liu<sup>1</sup>, Haoxiang Li<sup>1</sup>, Hao Kang<sup>1</sup>, Gang Hua<sup>1</sup>, and Nuno Vasconcelos<sup>2</sup>

<sup>1</sup> Wormpex AI Research

{richardboliu, lhxustcer, haokheseri, ganghua}@gmail.com

<sup>2</sup> University of California San Diego

nuno@ece.ucsd.edu

## 1 Proof of Lemma 1

**Lemma 1** Consider the augmentation of  $\mathcal{Z}_y^e$  with the snapshot transferred from epoch  $e' < e$  by EMANATE, i.e.  $\mathcal{A}_y^e = \mathcal{Z}_y^e \cup \mathcal{Z}_y^{e' \rightarrow e}$ , where  $\mathcal{Z}_y^{e' \rightarrow e}$  is as defined in (6, paper). Then

$$\begin{aligned} L_y(\mathcal{A}_y^e, \mathbf{W}^e, \mathbf{b}^e) - L_y(\mathcal{Z}_y^e, \mathbf{W}^e, \mathbf{b}^e) &\geq \\ \frac{L_y(\mathcal{Z}_y^{e'}, \mathbf{W}^{e'}, \mathbf{b}^{e'}) - L_y(\mathcal{Z}_y^e, \mathbf{W}^e, \mathbf{b}^e)}{2}, \end{aligned} \quad (1)$$

where  $(\mathbf{W}^e, \mathbf{b}^e)$  is the classifier of (10, paper).

*Proof.* From (9, paper),

$$\begin{aligned} L_y(\mathcal{A}_y^e, \mathbf{W}^e, \mathbf{b}^e) &= \\ &= \frac{1}{2}L_y(\mathcal{Z}_y^e, \mathbf{W}^e, \mathbf{b}^e) + \frac{1}{2}L_y(\mathcal{Z}_y^{e' \rightarrow e}, \mathbf{W}^e, \mathbf{b}^e) \end{aligned}$$

and since

$$\begin{aligned} L_y(\mathcal{Z}_y^{e' \rightarrow e}, \mathbf{W}^e, \mathbf{b}^e) &= L_y(\{\mathbf{z}_i^{e'} - \bar{\mathbf{z}}^{e'} + \bar{\mathbf{z}}^e\}, \mathbf{W}^e, \mathbf{b}^e) \\ &= -\frac{1}{|\mathcal{Z}_y^{e'}|} \sum_i \log \nu_y(\mathbf{W}^e \mathbf{z}_i^{e'} - \mathbf{W}^e \bar{\mathbf{z}}^{e'} + \mathbf{W}^e \bar{\mathbf{z}}^e + \mathbf{b}^e) \\ &= L(\mathcal{Z}_y^{e'}, \mathbf{W}^e, \mathbf{b}^e - \mathbf{W}^e \bar{\mathbf{z}}^{e'} + \mathbf{W}^e \bar{\mathbf{z}}^e) \end{aligned}$$

it follows from (10, paper) that

$$L_y(\mathcal{Z}_y^{e' \rightarrow e}, \mathbf{W}^e, \mathbf{b}^e) \geq L(\mathcal{Z}_y^{e'}, \mathbf{W}^{e'}, \mathbf{b}^{e'})$$

and

$$L_y(\mathcal{A}_y^e, \mathbf{W}^e, \mathbf{b}^e) \geq \frac{L_y(\mathcal{Z}_y^e, \mathbf{W}^e, \mathbf{b}^e) + L(\mathcal{Z}_y^{e'}, \mathbf{W}^{e'}, \mathbf{b}^{e'})}{2}$$

from which the lemma follows.
